# Supplementary material for: Can linear transportation infrastructure verges constitute a habitat and/or a corridor for insects in temperate landscapes? A systematic review
Source: Springer Nature journal article supplement (doi:10.1186/s13750-018-0117-3), 2018-01-22
Supplement: MOESM1 [file 13750_2018_117_MOESM1_ESM.docx]

Additional file 1: List of search terms pre-identified by the search team, sort by lexical field

| Biodiversity | LTI | Verges | Management practices | Habitats | Continuity | Measurements |
| --- | --- | --- | --- | --- | --- | --- |
| Biodiversity  Biological diversity  Diversity | Infrastructure | Verge  Right of way  Verge  Dependency  Road shoulder  Emergency lane  Safe lane | Management  Intensive  Extensive | Habitat  Landscape  Refuge | Green infrastructures  Blue-green infrastructure  Greenway  Corridor  Ecological corridor  River corridor  Riparian corridor Linear landscape element | Abundance  Floristic composition  Faunistic composition  Species richness  Diversity |
| Species  Ecosystem  Ecotone  Community | Linear | Edge  Side  Roadside | Pesticide  Biocide  Insecticide  Herbicide  Fungicide Biological Control  Biocontrol  Fertilizing  Eradication | Forest  Woodland  Farmland  Agriculture  Crops  Urban  Grassland  Hayfield  Forest-edge  Hedgerow  Hedge  Heath  Moor  Rangeland  Pasture  Meadows  Wetland | Migration corridor  Movement corridor  Movement lane  Migration lane  Migration  Migrate  Migratory  Movement  Mobility  Dispersal  Route  Itinerary  Passage  Path  Way  Pathway | Refuge  Habitat  Nesting site  Reproduction site  Feeding site |
| Flora  Plant | Transport  Transportation | Vicinity  Proximity | Plantation  Mowing  Reaping  Plowing  Pruning  Weeding  Clearing  Cutting  Mulching  Rameal Chipped Wood (RCW) | Artificial  Man-made | Along  Alongside | Dispersal  Movement  Gene Flow  Epizoochory  Seed dispersal |
| Fauna  Animal  Fish  Reptile  Birds  Amphibian  Mammal  Vertebrate  Insect | Rail  Railway  Railway lines  Railroad  Train track | Embankment  Ditch | Fence  Fence line  Wire netting  Wire mesh |  | Viability  Population  Gene  Flow  Colonization | Mortality  Loss  Decline |
| Ecological  Natural | Canal  Waterway  Shipping lane  Navigation lane  Channel | Riparian  Riparian strip  Riverside  Riverine  Bank  Riverbank  Floodplain  Wetland | Restoration  Compensation Mitigation |  | Connectivity  Connect  Connecting  Network  Continuity  Discontinuous  Discontinued | Invasion  Invasive  Allergy |
| Conservation | River  Stream  Course | Central reservation  Intersection reservation | Underpass  Overpass  Tunnel  Culvert |  |  | Disturbance  Degradation |
| Nature  Wildlife | Power line  Electric line  High-tension line | Rest area | Pasture |  |  |  |
| Exotic  Invasive  Indigenous  Native | Electric pylon | Buffer strip  Grass strip  Vegetated strip | Burning  Stubble burning |  |  |  |
| Aquatic  Terrestrial | Pipeline  Gas pipeline  Oil pipeline |  | Ditching |  |  |  |
|  | Road  Highway  Motorway  Freeway  Roadway |  | Pollution Contamination Depollution  Decontamination |  |  |  |
|  | Turnpike  Pike |  |  |  |  |  |
