# Supplementary material for: Can linear transportation infrastructure verges constitute a habitat and/or a corridor for insects in temperate landscapes? A systematic review
Source: Springer Nature journal article supplement (doi:10.1186/s13750-018-0117-3), 2018-01-22
Supplement: MOESM3 [file 13750_2018_117_MOESM3_ESM.docx]

Search strings* used in Google Scholar:

- (riparian OR riverside OR riverbank OR waterway OR canal) (corridor OR dispersal OR habitat OR refuge OR abundance OR richness OR diversity OR composition OR community OR communities)
- (road OR roadside OR highway) (corridor OR dispersal OR habitat OR refuge OR "right of way" OR "rights of ways" OR verge OR abundance OR richness OR composition OR diversity OR community OR communities)
- (railway OR railroad) (corridor OR dispersal OR habitat OR refuge OR "right of way" OR "rights of ways" OR verge OR abundance OR richness OR composition OR diversity OR community OR communities)
- (pipeline) (corridor OR dispersal OR habitat OR refuge OR "right of way" OR "rights of ways" OR verge OR abundance OR richness OR composition OR diversity OR community OR communities)
- ("power line" OR "power lines" OR "transmission line" OR "transmission lines") (corridor OR dispersal OR habitat OR refuge OR "right of way" OR "rights of ways" OR verge OR abundance OR richness OR composition OR diversity OR community OR communities)

* Results sorted by relevance, with the boxes "include patents" and "include citations" unchecked
