# Supplementary material for: Can linear transportation infrastructure verges constitute a habitat and/or a corridor for insects in temperate landscapes? A systematic review
Source: Springer Nature journal article supplement (doi:10.1186/s13750-018-0117-3), 2018-01-22
Supplement: MOESM8 [file 13750_2018_117_MOESM8_ESM.docx]

Additional file 8: Results of the publication bias analysis for abundance and species richness: funnel plots and plots of the mean cumulative meta-analysis by publication year

Abundance

Funnel plot of the effect sizes for abundance

Plot of the mean effect sizes by publication year

Species richness

Funnel plot of the effect sizes for abundance

Plot of the mean effect sizes by publication year
